# Supplementary material for: TP53 Targeted Deep Sequencing of Cell-Free DNA in Esophageal Squamous Cell Carcinoma Using Low-Quality Serum: Concordance with Tumor Mutation
Source: MDPI journal article supplement (doi:10.3390/ijms22115627), 2021-05-26

**Supplementary table S1: List of *TP53* variants detected in esophageal tumor FFPE tissue which were not detected in serum cfDNA**

| Variant coordinate | Protein variant | Mutation effect | Domain function   | REVEL score |
|--------------------|-----------------|-----------------|-------------------|-------------|
| 7579458G>T         | P77T            | missense        | SH3-like/Pro-rich | 0.305       |
| 7579456T>G         | P77P            | silent          | SH3-like/Pro-rich | ---         |
| 7578467T>G         | T155P           | missense        | DNA binding       | 0.581       |
| 7578444G>A         | I162I           | silent          | DNA binding       | ---         |
| 7578413C>T         | V173M           | missense        | DNA binding       | 0.892       |
| 7578413C>A         | V173L           | missense        | DNA binding       | 0.88        |
| 7578397T>G         | H178P           | missense        | DNA binding       | 0.918       |
| 7578263G>A         | R196*           | nonsense        | DNA binding       | ---         |
| 7578259A>C         | V197G           | missense        | DNA binding       | 0.914       |
| 7578204A>C         | S215R           | missense        | DNA binding       | 0.917       |
| 7578203C>T         | V216M           | missense        | DNA binding       | 0.956       |
| 7578191A>T         | Y220N           | missense        | DNA binding       | 0.91        |
| 7578177C>T         | E224E           | splice          | DNA binding       | ---         |
| 7577576G>A         | N235N           | silent          | DNA binding       | ---         |
| 7577551C>A         | G244C           | missense        | DNA binding       | 0.94        |
| 7577535C>A         | R249M           | missense        | DNA binding       | 0.911       |
| 7577141C>T         | G266E           | missense        | DNA binding       | 0.973       |
| 7577124C>A         | V272L           | missense        | DNA binding       | 0.878       |
| 7577123A>C         | V272G           | missense        | DNA binding       | 0.707       |
| 7577082C>T         | E286K           | missense        | DNA binding       | 0.949       |
| 7577079C>A         | E287*           | nonsense        | DNA binding       | ---         |
| 7577022G>A         | R306*           | nonsense        | NA                | ---         |

**Supplementary table S2:** List of *TP53* variants were concordantly detected in archival serum cfDNA and esophageal tumor tissue biopsy.

| Status  | Variant genomic coordinate | Protein variant | REVEL score | Q-value | No. reference reads | No. alternative reads | RVS  | Genomic position error | Mutation effect | Domain function | Mean coverage |
|---------|----------------------------|-----------------|-------------|---------|---------------------|-----------------------|------|------------------------|-----------------|-----------------|---------------|
| Case    | 7577045TC>T                | p.?             | NA          | 618.6   | 28385               | 94                    | 0.58 | 0.000089               | NA              | NA              | 476389.5      |
| Case    | 7579358C>A                 | R110L           | 0.63        | 34.1    | 48454               | 22                    | 0.69 | 0.000079               | missense        | DNA binding     | 425847.5      |
| Case    | 7578454G>T                 | A159D           | 0.84        | 245.0   | 27974               | 62                    | 0.62 | 0.000087               | NA              | NA              | 840911.5      |
| Case    | 7578469C>A                 | G154V           | 0.75        | 226.3   | 46902               | 78                    | 0.51 | 0.000099               | missense        | DNA binding     | 840911.5      |
| Control | 7577121G>T                 | R273S           | 0.91        | 51.9    | 36510               | 33                    | 0.62 | 0.000105               | missense        | DNA binding     | 523326.5      |
| Control | 7577509C>T                 | E258K           | 0.96        | 47.0    | 40180               | 65                    | 0.63 | 0.000409               | missense        | DNA binding     | 523326.5      |
| Case    | 7578525G>C                 | C135W           | 0.88        | 47.6    | 34450               | 22                    | 0.57 | 0.000069               | missense        | DNA binding     | 560905.5      |
| Case    | 7577073G>A                 | L289F           | 0.34        | 82.9    | 49516               | 109                   | 0.53 | 0.000385               | missense        | DNA binding     | 641517.5      |
| Case    | 7578212G>A                 | R213*           | ---         | 114.2   | 4305                | 41                    | 0.59 | 0.000727               | nonsense        | DNA binding     | 641517.5      |
| Case    | 7577535CTCCGGT>C           | p.?             | NA          | 1000.0  | 48848               | 69                    | 0.77 | 5.50E-07               | NA              | NA              | 813073.5      |
| Case    | 7577121G>T                 | R273S           | 0.91        | 44.1    | 21364               | 20                    | 0.59 | 0.000105               | missense        | DNA binding     | 389311        |
| Case    | 7578234A>C                 | Y205*           | ---         | 58.1    | 5571                | 18                    | 0.58 | 0.000169               | nonsense        | DNA binding     | 389311        |
| Control | 7577509C>T                 | E258K           | 0.96        | 52.4    | 28867               | 53                    | 0.57 | 0.000409               | missense        | DNA binding     | 592767.5      |
| Case    | 7577079C>T                 | p.E287K         | 0.58        | 40.0    | 49625               | 69                    | 0.70 | 0.000248               | missense        | DNA binding     | 735729        |
| Case    | 7577536T>A                 | R249W           | 0.85        | 507.2   | 49234               | 261                   | 0.52 | 0.00028                | missense        | DNA binding     | 677844        |
| Case    | 7577556C>A                 | C242F           | 0.98        | 103.9   | 40386               | 48                    | 0.54 | 0.000084               | missense        | DNA binding     | 928413.5      |
| Case    | 7573029G>A                 | p.?             | NA          | 1000.0  | 9036                | 2029                  | 0.64 | 0.000953               | intronic        | NA              | 575176        |
| Case    | 7577079C>T                 | p.E287K         | 0.58        | 34.3    | 49690               | 62                    | 0.58 | 0.000248               | missense        | DNA binding     | 814802        |
| Case    | 7577018C>T                 | p.?             | NA          | 202.1   | 48086               | 263                   | 0.52 | 0.000624               | splice          | NA              | 732647        |
| Control | 7577536T>A                 | R249W           | 0.85        | 37.0    | 49537               | 51                    | 0.64 | 0.00028                | missense        | DNA binding     | 908029.5      |
| Control | 7577580T>C                 | Y234C           | 0.94        | 69.0    | 49235               | 210                   | 0.61 | 0.001618               | missense        | DNA binding     | 908029.5      |
| Control | 7577509C>T                 | E258K           | 0.96        | 92.3    | 42415               | 98                    | 0.64 | 0.000409               | missense        | DNA binding     | 429553.5      |

**Supplementary table S3.** Frequency of neoantigen formation among *TP53* variants detected in several organ malignancies (Bladder, breast, head&neck, prostate, colorectal, stomach, kidney, liver, and lung) matched with the variants in the Golestan ESCC study.

| Available data about neoantigen frequency | Concordant mutation with tumor in cfDNA | Protein variant | Frequency of neoantigen formation | Frequency of reported mutation | Mutation protein affinity | Frequency of HLA subtypes |
|-------------------------------------------|-----------------------------------------|-----------------|-----------------------------------|--------------------------------|---------------------------|---------------------------|
| NA                                        | No                                      | E224E           | .                                 | .                              | .                         | .                         |
| NA                                        | No                                      | E287*           | .                                 | .                              | .                         | .                         |
| NA                                        | No                                      | H178P           | .                                 | .                              | .                         | .                         |
| NA                                        | No                                      | I162I           | .                                 | .                              | .                         | .                         |
| NA                                        | No                                      | L289F           | .                                 | .                              | .                         | .                         |
| NA                                        | No                                      | N235N           | .                                 | .                              | .                         | .                         |
| NA                                        | No                                      | P77P            | .                                 | .                              | .                         | .                         |
| NA                                        | No                                      | P77T            | .                                 | .                              | .                         | .                         |
| NA                                        | No                                      | R196*           | .                                 | .                              | .                         | .                         |
| NA                                        | No                                      | R306*           | .                                 | .                              | .                         | .                         |
| NA                                        | No                                      | S215R           | .                                 | .                              | .                         | .                         |
| NA                                        | No                                      | T155P           | .                                 | .                              | .                         | .                         |
| NA                                        | No                                      | V272G           | .                                 | .                              | .                         | .                         |
| NA                                        | No                                      | Y220N           | .                                 | .                              | .                         | .                         |
| A                                         | No                                      | E286K           | 0.000081                          | 0.0014197                      | 290.3075                  | 0.0570792                 |
| A                                         | No                                      | G244C           | 0.0000459                         | 0.0007744                      | 207.3986                  | 0.0592                    |
| A                                         | No                                      | G266E           | 0.0000667                         | 0.0011616                      | 212.9428                  | 0.0574209                 |
| A                                         | No                                      | R249M           | 0.0000463                         | 0.0006453                      | 207.443                   | 0.0717923                 |
| A                                         | No                                      | V173L           | 0.0000356                         | 0.0011616                      | 208.5529                  | 0.0306836                 |
| A                                         | No                                      | V173M           | 0.0000424                         | 0.0012907                      | 178.2108                  | 0.0328753                 |
| A                                         | No                                      | V197G           | 0.0000233                         | 0.0003872                      | 255.5718                  | 0.0603116                 |
| A                                         | No                                      | V216M           | 0.0000564                         | 0.0010325                      | 163.6288                  | 0.054587                  |
| A                                         | No                                      | V272L           | 0.0000252                         | 0.0003872                      | 203.1794                  | 0.0651862                 |
| NA                                        | Yes                                     | A159D           | .                                 | .                              | .                         | .                         |
| NA                                        | Yes                                     | C135W           | .                                 | .                              | .                         | .                         |
| NA                                        | Yes                                     | E287K           | .                                 | .                              | .                         | .                         |
| NA                                        | Yes                                     | L289F           | .                                 | .                              | .                         | .                         |
| NA                                        | Yes                                     | R213*           | .                                 | .                              | .                         | .                         |
| NA                                        | Yes                                     | Y205*           | .                                 | .                              | .                         | .                         |
| A                                         | Yes                                     | C242F           | 0.0000892                         | 0.0014197                      | 159.7191                  | 0.0628105                 |
| A                                         | Yes                                     | E258K           | 0.0000211                         | 0.0005163                      | 149.7165                  | 0.0408379                 |
| A                                         | Yes                                     | G154V           | 0.0000515                         | 0.0009035                      | 189.5567                  | 0.0569621                 |
| A                                         | Yes                                     | R110L           | 0.0000773                         | 0.0012907                      | 179.6394                  | 0.0598606                 |
| A                                         | Yes                                     | R249W           | 0.0000261                         | 0.0003872                      | 219.3091                  | 0.0674152                 |
| A                                         | Yes                                     | R273S           | 0.0000515                         | 0.0009035                      | 182.714                   | 0.0569566                 |
| A                                         | Yes                                     | Y234C           | 0.0000981                         | 0.001936                       | 210.6004                  | 0.0506831                 |

**Supplementary Figure S1 :** Regression graphs for detected mutations in cfDNA per position and alteration.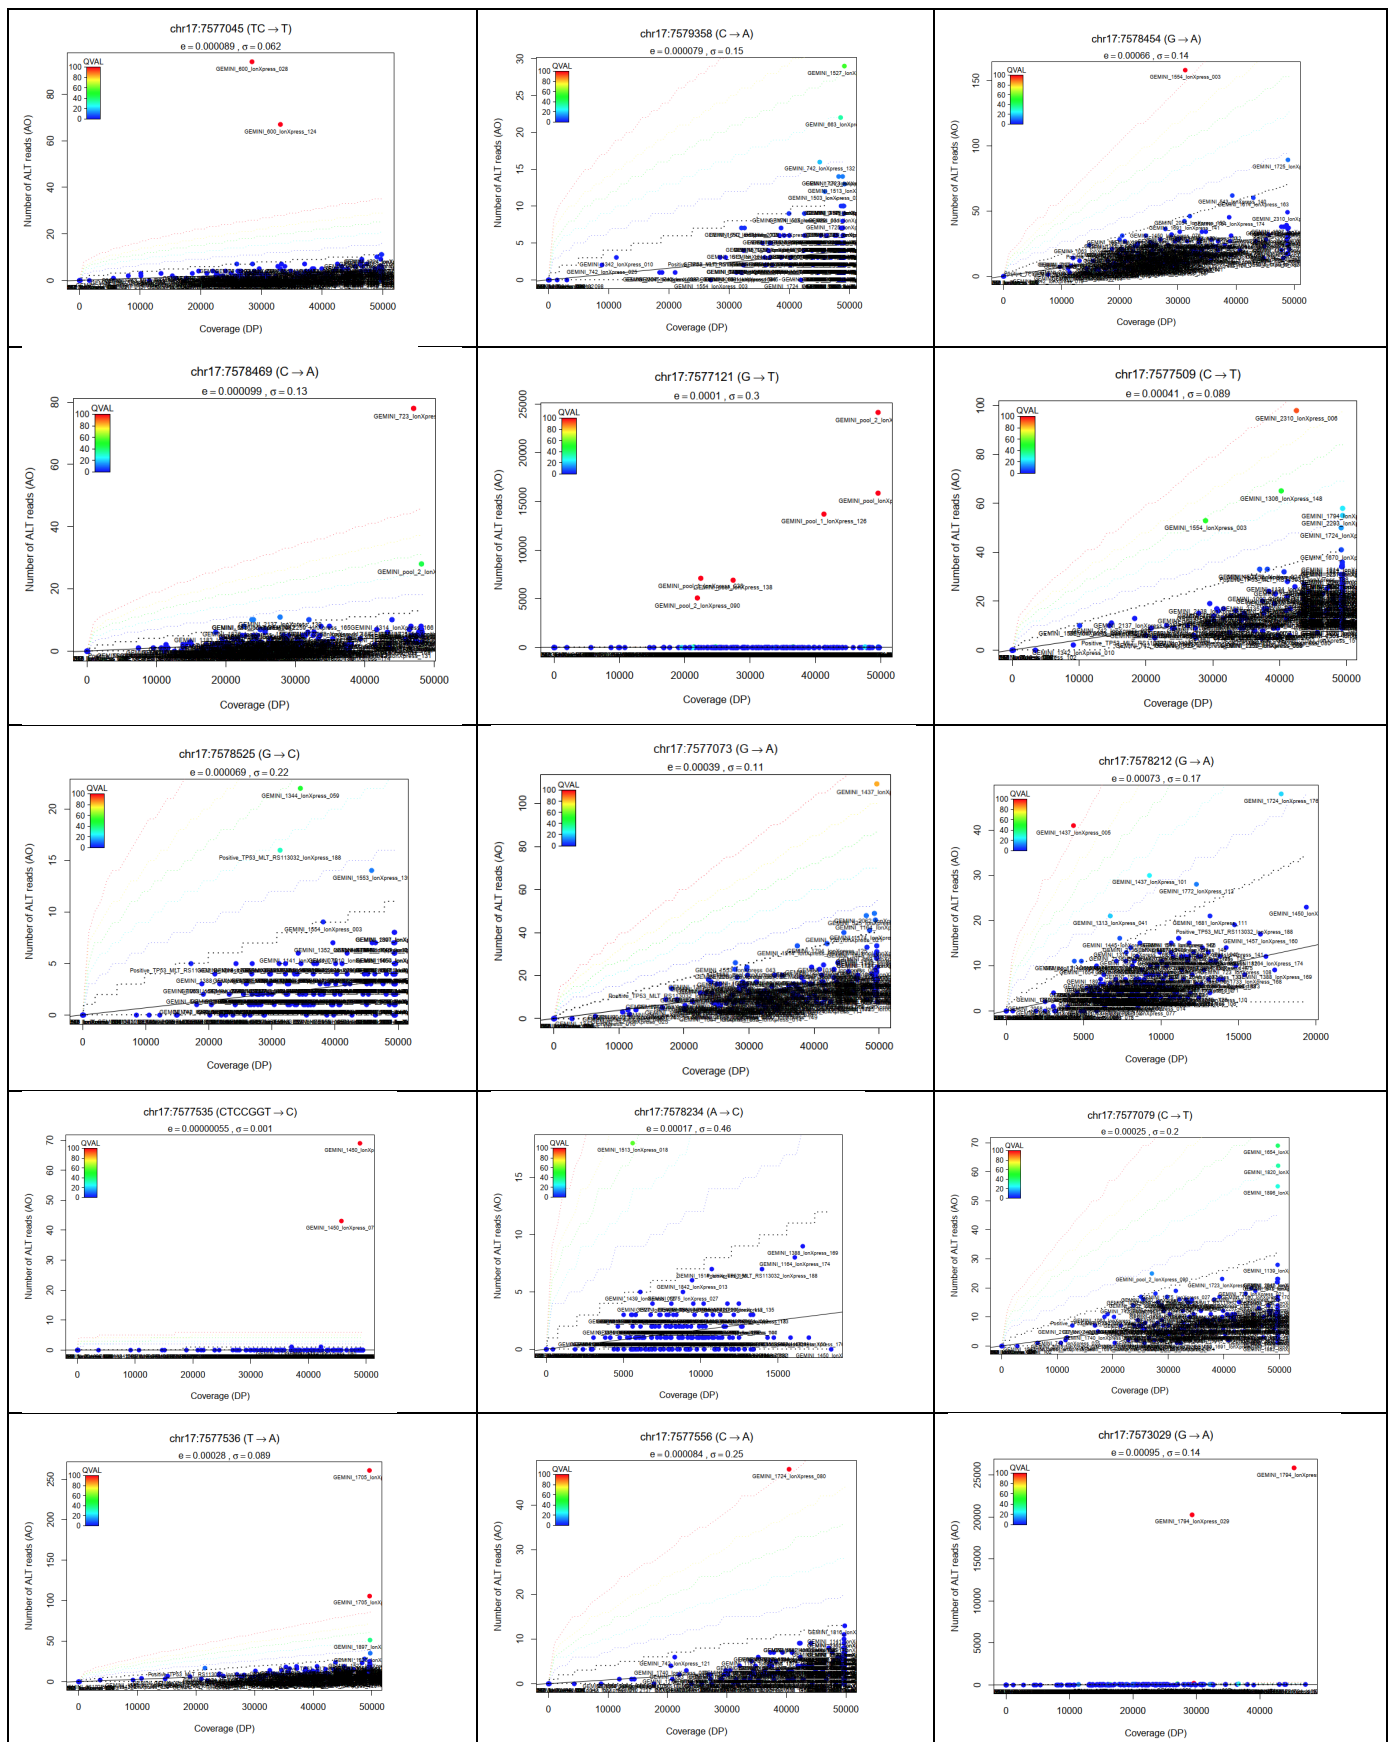

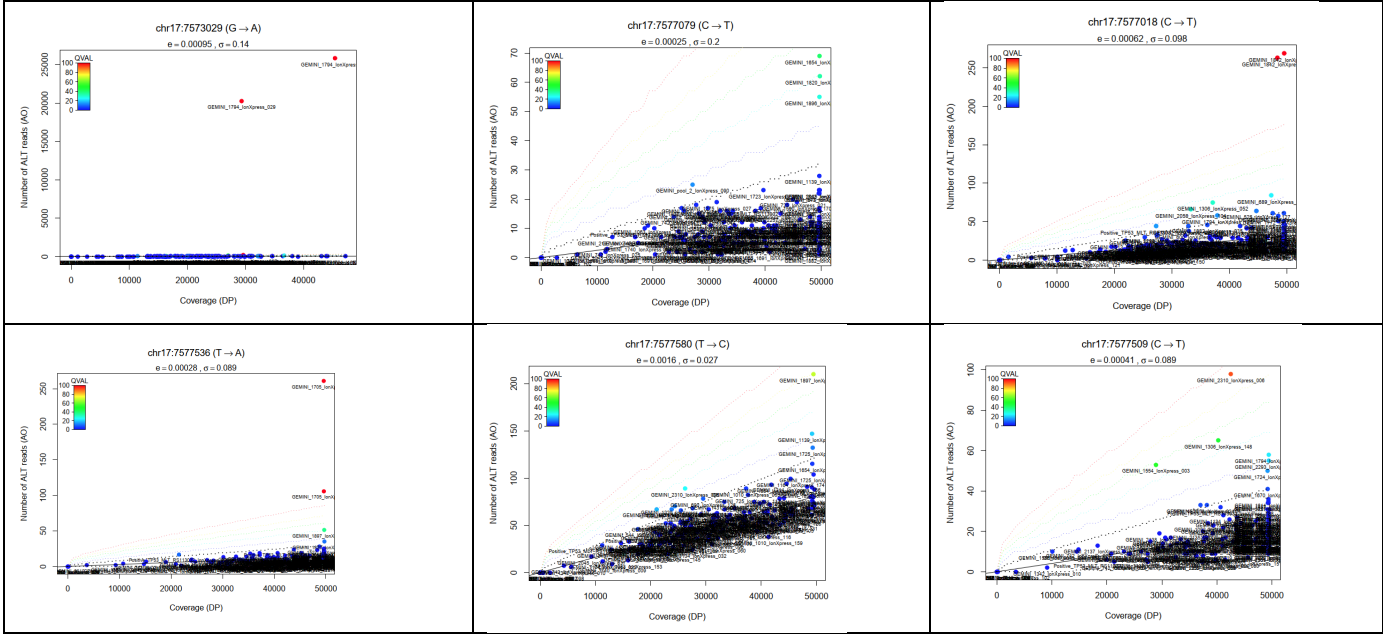

**Supplementary Figure S2:** No statistical difference in HLA distribution of neoantigen formation of tumor *TP53* variants relevant to detectability in cfDNA. Boxplot shows higher frequency of neoantigen formations among cfDNA detected *TP53* mutations.

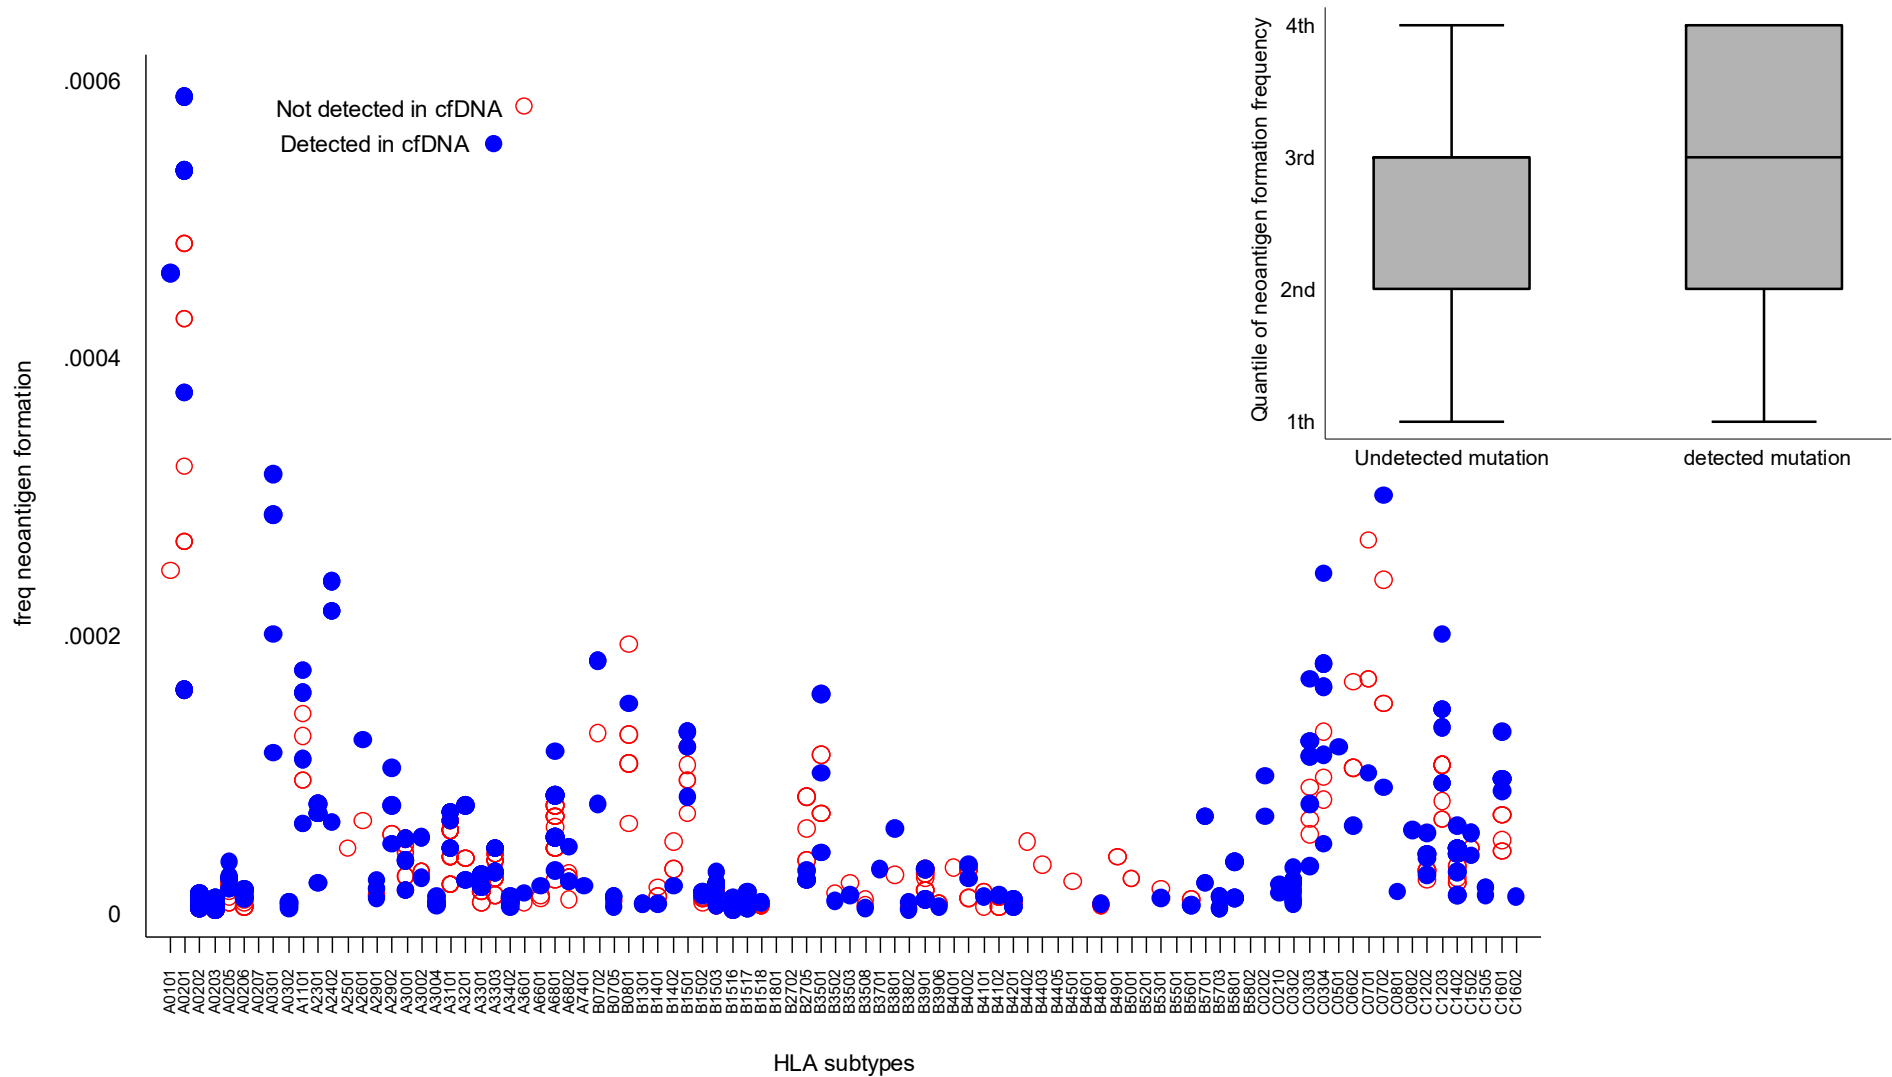

Supplement: s1 [file s1]
